# Supplementary material for: Examining Perceptions about Mandatory Influenza Vaccination of Healthcare Workers through Online Comments on News Stories
Source: PubMed Central journal article supplement (PMC4473076; doi:10.1371/journal.pone.0129993), 2015-06-18
Supplement: pone.0129993.s001.pdf [file pone.0129993.s001.pdf]

## S1 Figure: Number of times a source is cited (if n>1), divided by sentiment

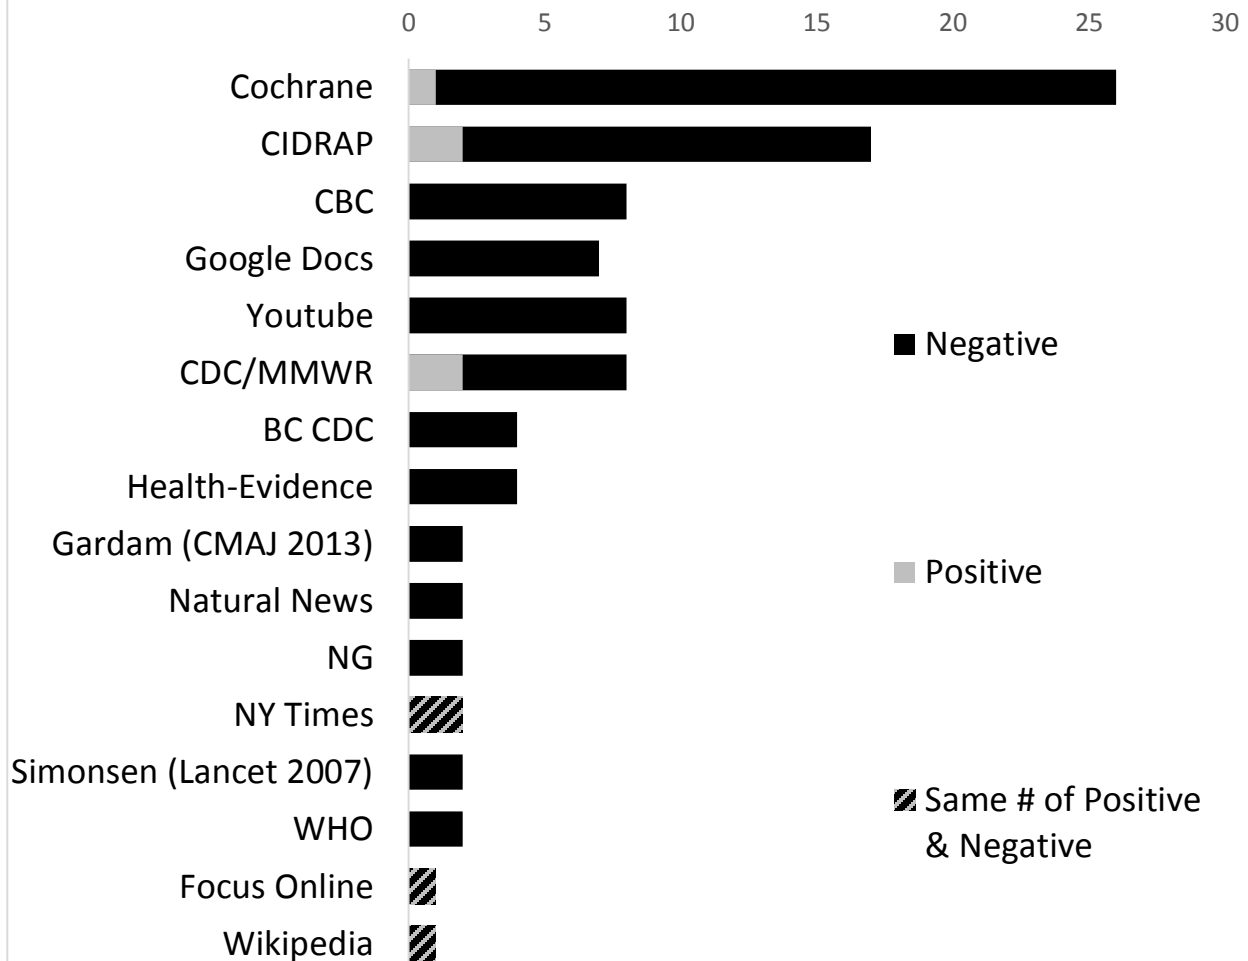

CIDRAP = Center for Infectious Disease Research and Policy

CBC = Canadian Broadcasting Corporation

CDC/MMWR = Centers for Disease Control and Prevention: Morbidity and Mortality Weekly Report

BC CDC = British Columbia Centre for Disease Control

WHO = World Health Organization

Google Docs – “Masking the Problem”

<https://sites.google.com/site/vaccinesandmasks/>

CIDRAP – The Compelling Need for Game- Changing Influenza Vaccines

[http://www.cidrap.umn.edu/sites/default/files/public/downloads/ccivi\\_report.pdf](http://www.cidrap.umn.edu/sites/default/files/public/downloads/ccivi_report.pdf)
