# Supplementary material for: Examining Perceptions about Mandatory Influenza Vaccination of Healthcare Workers through Online Comments on News Stories
Source: PubMed Central journal article supplement (PMC4473076; doi:10.1371/journal.pone.0129993), 2015-06-18
Supplement: pone.0129993.s002.pdf [file pone.0129993.s002.pdf]

**S1 Table: Eligible Canadian news articles**

| Agency                                  | Article Title                                                                                                                     | WebCite                                                                                 | # of comments | Date              |
|-----------------------------------------|-----------------------------------------------------------------------------------------------------------------------------------|-----------------------------------------------------------------------------------------|---------------|-------------------|
| Canadian Broadcasting Corporation (CBC) | <b>Compulsory flu shots for health workers called 'premature'</b>                                                                 | <a href="http://www.webcitation.org/6HWGqndVg">http://www.webcitation.org/6HWGqndVg</a> | 86            | March 25, 2013    |
| CBC                                     | <b>BC suspends health workers' mandatory flu shots</b>                                                                            | <a href="http://www.webcitation.org/6HWH3iEQq">http://www.webcitation.org/6HWH3iEQq</a> | 5             | December 4, 2012  |
| CBC                                     | <b>Flu shots for hospital workers enforced in U.S.</b>                                                                            | <a href="http://www.webcitation.org/6HWIAiBGA">http://www.webcitation.org/6HWIAiBGA</a> | 10            | January 15, 2013  |
| CBC                                     | <b>Mandate flu vaccines for health-care workers, journal says</b>                                                                 | <a href="http://www.webcitation.org/6HWIHp8Z2">http://www.webcitation.org/6HWIHp8Z2</a> | 175           | October 29, 2012  |
| CBC                                     | <b>Hospital flu shot policy 'a little bit draconian'</b>                                                                          | <a href="http://www.webcitation.org/6HWIJSaCK">http://www.webcitation.org/6HWIJSaCK</a> | 14            | January 30, 2013  |
| The Globe & Mail (GM)                   | <b>Doctor stirs debate over mandatory flu shots</b>                                                                               | <a href="http://archive.is/nivwk">http://archive.is/nivwk</a>                           | 22            | March 25, 2013    |
| GM                                      | <b>Health workers should make flu shot a point of pride</b>                                                                       | <a href="http://archive.is/hUXb8">http://archive.is/hUXb8</a>                           | 14            | January 30, 2013  |
| GM                                      | <b>Health-care workers cheer softened stand on flu shots</b>                                                                      | <a href="http://archive.is/C4Uum">http://archive.is/C4Uum</a>                           | 19            | December 3, 2012  |
| GM                                      | <b>Flu shot should be mandatory, journal says</b>                                                                                 | <a href="http://archive.is/7VxXb">http://archive.is/7VxXb</a>                           | 37            | October 29, 2012  |
| GM                                      | <b>New flu season policy targets B.C. health workers</b>                                                                          | <a href="http://archive.is/5FYE4">http://archive.is/5FYE4</a>                           | 10            | August 23, 2012   |
| The National Post (NP)                  | <b>Nurse's aide sent home for refusing flu shot the latest healthcare worker suspended in push to make immunization mandatory</b> | <a href="http://www.webcitation.org/6HWItcE2r">http://www.webcitation.org/6HWItcE2r</a> | 233           | January 24, 2013  |
| NP                                      | <b>Union cites possible 'philosophical or religious objections' as B.C. nurses balk at forced flu vaccinations</b>                | <a href="http://www.webcitation.org/6HWIwTtDP">http://www.webcitation.org/6HWIwTtDP</a> | 119           | October 23, 2012  |
| NP                                      | <b>Hold off on mandatory flu shots for health workers until vaccine is more effective: Toronto specialist</b>                     | <a href="http://www.webcitation.org/6HWIyzaZL">http://www.webcitation.org/6HWIyzaZL</a> | 13            | March 25, 2013    |
| CTV Television Network (CTV)            | <b>Debate over mandatory flu shots for health-care workers premature: expert</b>                                                  | <a href="http://www.webcitation.org/6HWJ8XlpF">http://www.webcitation.org/6HWJ8XlpF</a> | 9             | March 25, 2013    |
| CTV                                     | <b>U.S. hospitals grapple with crackdown on workers refusing flu shots</b>                                                        | <a href="http://www.webcitation.org/6HWJA8TPo">http://www.webcitation.org/6HWJA8TPo</a> | 15            | January 12, 2013  |
| CTV                                     | <b>Should the flu shot be mandatory for health care workers?</b>                                                                  | <a href="http://www.webcitation.org/6HWJBVG7A">http://www.webcitation.org/6HWJBVG7A</a> | 67            | January 4, 2013   |
| CTV                                     | <b>B.C. Nurses' Union continues fight over mandatory flu shots</b>                                                                | <a href="http://www.webcitation.org/6HWJDCHmm">http://www.webcitation.org/6HWJDCHmm</a> | 17            | November 15, 2012 |

|                         |                                                                                           |                                                                                         |    |                   |
|-------------------------|-------------------------------------------------------------------------------------------|-----------------------------------------------------------------------------------------|----|-------------------|
| CTV                     | <b>Op-ed adds ammo to fight over mandatory flu shots</b>                                  | <a href="http://www.webcitation.org/6HWJFToNJ">http://www.webcitation.org/6HWJFToNJ</a> | 12 | November 14, 2012 |
| CTV                     | <b>Flu shots should be mandatory for hospital workers: CMAJ</b>                           | <a href="http://www.webcitation.org/6HWJHyIax">http://www.webcitation.org/6HWJHyIax</a> | 68 | October 29, 2012  |
| CTV                     | <b>Health care workers face firing over flu shots: union</b>                              | <a href="http://www.webcitation.org/6HWJOuPpm">http://www.webcitation.org/6HWJOuPpm</a> | 26 | October 24, 2012  |
| CTV                     | <b>Mandatory flu shots concern B.C. health-care workers</b>                               | <a href="http://www.webcitation.org/6HWJQLaTX">http://www.webcitation.org/6HWJQLaTX</a> | 19 | August 24, 2012   |
| Coast Reporter          | <b>Mandatory flu shot concerns nurses</b>                                                 | <a href="http://www.webcitation.org/6HWJRer3K">http://www.webcitation.org/6HWJRer3K</a> | 2  | August 31, 2012   |
| Comox Valley Record     | <b>Flu edict for health-care workers will not be enforced</b>                             | <a href="http://www.webcitation.org/6HWJTuWjQ">http://www.webcitation.org/6HWJTuWjQ</a> | 1  | December 6, 2012  |
| Cowichan News Leader    | <b>It will be needles or masks for front-line workers in local health care operations</b> | <a href="http://www.webcitation.org/6HWJWZqEk">http://www.webcitation.org/6HWJWZqEk</a> | 1  | September 1, 2012 |
| The Kamloops Daily News | <b>Flu shot requirement relaxed</b>                                                       | <a href="http://www.webcitation.org/6HWJYPiOE">http://www.webcitation.org/6HWJYPiOE</a> | 18 | December 5, 2012  |
| The Kamloops Daily News | <b>Mandatory shots asking for trouble</b>                                                 | <a href="http://www.webcitation.org/6HWJZOm9y">http://www.webcitation.org/6HWJZOm9y</a> | 20 | November 19, 2012 |
| The Kamloops Daily News | <b>Health-care workers face stricter flu policies</b>                                     | <a href="http://www.webcitation.org/6HWJaa1tq">http://www.webcitation.org/6HWJaa1tq</a> | 3  | August 23, 2012   |
| The Kamloops Daily News | <b>Unions, health officials to meet over new flu policy</b>                               | <a href="http://www.webcitation.org/6HWJbMKAq">http://www.webcitation.org/6HWJbMKAq</a> | 23 | May 17, 2013      |
| Kamloops This Week      | <b>Too many health-care workers immunized against knowledge</b>                           | <a href="http://www.webcitation.org/6HWJcXwGu">http://www.webcitation.org/6HWJcXwGu</a> | 4  | August 27, 2012   |
| Surrey Leader           | <b>Health union fighting needle-or-mask flu edict</b>                                     | <a href="http://www.webcitation.org/6HWJdZbvM">http://www.webcitation.org/6HWJdZbvM</a> | 4  | October 25, 2012  |
| The Tye                 | <b>BC backing down on flu shot requirement, says BCNU</b>                                 | <a href="http://www.webcitation.org/6HWJeTHmq">http://www.webcitation.org/6HWJeTHmq</a> | 21 | November 30, 2012 |
| The Tye                 | <b>Why Your Nurse Didn't Have to Take a Flu Shot</b>                                      | <a href="http://www.webcitation.org/6HWJfCr5a">http://www.webcitation.org/6HWJfCr5a</a> | 33 | February 23, 2012 |
| The Tye                 | <b>BC nurses concerned about choice of flut shots or mask</b>                             | <a href="http://www.webcitation.org/6HWJgFi3J">http://www.webcitation.org/6HWJgFi3J</a> | 23 | August 24, 2012   |
| The Vancouver Sun       | <b>Editorial: healthcare workers should get the flu shot</b>                              | <a href="http://www.webcitation.org/6HWJhAv4h">http://www.webcitation.org/6HWJhAv4h</a> | 3  | April 17, 2013    |
| The Vancouver Sun       | <b>Editorial: Don't let dispute fool you — get a flu shot</b>                             | <a href="http://www.webcitation.org/6HWJjy3W">http://www.webcitation.org/6HWJjy3W</a>   | 5  | November 16, 2012 |
| The Vancouver Sun       | <b>B.C. to require health-care workers to get flu shot or wear masks</b>                  | <a href="http://www.webcitation.org/6HWJksAcS">http://www.webcitation.org/6HWJksAcS</a> | 12 | August 24, 2012   |
